# Supplementary material for: Non-O ABO blood group genotypes differ in their associations with Plasmodium falciparum rosetting and severe malaria
Source: PubMed Central journal article supplement (PMC10522014; doi:10.1371/journal.pgen.1010910), 2023-09-14
Supplement: pgen.1010910.s001.pdf [file pgen.1010910.s001.pdf]

**S1 Table: The general characteristics of children recruited to the case-control study by *ABO* genotype**

| <i>ABO</i> genotype                                |                 | <i>OO</i> (%) | <i>AO</i> (%) | <i>AA</i> (%) | <i>BO</i> (%) | <i>BB</i> (%) | <i>AB</i> (%) | <i>p</i> value |       |
|----------------------------------------------------|-----------------|---------------|---------------|---------------|---------------|---------------|---------------|----------------|-------|
| <b>Disease category</b>                            | Controls n=3872 | 2126 (54.9)   | 810 (20.9)    | 83 (2.1)      | 683 (17.6)    | 55 (1.4)      | 115 (3.0)     | Reference      |       |
|                                                    | All SM n=1398   | 623 (44.6)    | 306 (21.9)    | 37 (2.6)      | 337 (24.1)    | 34 (2.4)      | 61 (4.4)      | <0.001         |       |
|                                                    | CM n=716        | 326 (45.5)    | 166 (23.2)    | 22 (3.1)      | 160 (22.3)    | 16 (2.2)      | 26 (3.6)      | 0.001          |       |
|                                                    | SMA n=415       | 181 (43.6)    | 97 (23.4)     | 9 (2.2)       | 99 (23.9)     | 10 (2.4)      | 19 (4.6)      | <0.001         |       |
|                                                    | RD n=417        | 181 (43.4)    | 101 (24.2)    | 13 (3.1)      | 99 (23.7)     | 11 (2.6)      | 12 (2.9)      | <0.001         |       |
|                                                    | Died n=116      | 52 (44.8)     | 33 (28.4)     | 2 (1.7)       | 23 (19.8)     | 2 (1.7)       | 4 (3.4)       | 0.339          |       |
| <b>Gender (controls)</b>                           | Males           | 1075 (55.0)   | 397 (20.3)    | 31 (1.6)      | 353 (18.1)    | 26 (1.3)      | 71 (3.6)      |                |       |
|                                                    | Females         | 1051 (54.8)   | 413 (21.5)    | 52 (2.7)      | 330 (17.2)    | 29 (1.5)      | 44 (2.3)      | 0.025          |       |
|                                                    | <b>(cases)</b>  | Males         | 332 (46.4)    | 155 (21.3)    | 16 (2.2)      | 161 (22.5)    | 19 (2.7)      | 35 (4.9)       |       |
|                                                    |                 | Females       | 291 (42.6)    | 154 (22.6)    | 21 (3.1)      | 176 (25.8)    | 15 (2.2)      | 26 (3.8)       | 0.401 |
| <b>Ethnic group (controls)</b>                     | Giriama         | 964 (53.7)    | 377 (21.0)    | 38 (2.1)      | 336 (18.7)    | 24 (1.3)      | 55 (3.1)      |                |       |
|                                                    | Chonyi          | 796 (57.6)    | 291 (21.1)    | 34 (2.5)      | 209 (15.1)    | 16 (1.2)      | 36 (2.6)      |                |       |
|                                                    | Kauma           | 232 (52.1)    | 91 (20.5)     | 6 (1.4)       | 95 (21.4)     | 8 (1.8)       | 13 (2.9)      |                |       |
|                                                    | Others          | 134 (53.4)    | 51 (20.3)     | 5 (2.0)       | 43 (17.1)     | 7 (2.8)       | 11(4.4)       | 0.117          |       |
|                                                    | <b>(cases)</b>  | Giriama       | 372 (44.2)    | 178 (21.2)    | 24 (2.9)      | 209 (24.9)    | 23 (2.7)      | 35 (4.2)       |       |
|                                                    |                 | Chonyi        | 144 (45.7)    | 73 (23.2)     | 3 (1.0)       | 80 (25.4)     | 7 (2.2)       | 8 (2.5)        |       |
|                                                    |                 | Kauma         | 36 (38.7)     | 22 (23.7)     | 4 (4.3)       | 19 (20.4)     | 2 (2.2)       | 10 (10.8)      |       |
|                                                    |                 | Others        | 71 (47.7)     | 33 (22.2)     | 6 (4.0)       | 29 (19.5)     | 2 (1.3)       | 8 (5.4)        | 0.102 |
| <b>Sickle genotype (controls)</b>                  | AA              | 1779 (54.7)   | 693 (21.3)    | 67 (2.1)      | 578 (17.8)    | 43 (1.3)      | 92 (2.8)      |                |       |
|                                                    | AS              | 328 (55.9)    | 109 (18.6)    | 16 (2.7)      | 99 (16.9)     | 12 (2.0)      | 23 (3.9)      |                |       |
|                                                    | SS              | 19 (57.6)     | 8 (24.2)      | 0 (0.0)       | 6 (18.2)      | 0 (0.0)       | 0 (0.0)       | 0.496          |       |
|                                                    | <b>(cases)</b>  | AA            | 615 (44.7)    | 303 (22.0)    | 37 (2.7)      | 329 (23.9)    | 33 (2.4)      | 58 (4.2)       |       |
|                                                    |                 | AS            | 6 (30.0)      | 2 (10.0)      | 0 (0.0)       | 8 (40.0)      | 1 (5.0)       | 3 (15.0)       | 0.058 |
|                                                    |                 | SS            | -             | -             | -             | -             | -             | -              |       |
| <b><math>\alpha</math>+thalassaemia (controls)</b> | <i>aa/aa</i>    | 725 (54.7)    | 271 (20.5)    | 36 (2.7)      | 226 (17.1)    | 23 (1.7)      | 44 (3.3)      |                |       |
|                                                    | <i>-a/aa</i>    | 1058 (55.2)   | 400 (20.9)    | 34 (1.8)      | 345 (18)      | 22 (1.2)      | 58 (3.0)      |                |       |
|                                                    | <i>-a/-a</i>    | 342 (54.6)    | 137 (21.9)    | 13 (2.1)      | 112 (17.9)    | 10 (1.6)      | 13 (2.1)      | 0.584          |       |
|                                                    | <b>(cases)</b>  | <i>aa/aa</i>  | 247 (46.3)    | 112 (21.0)    | 14 (2.6)      | 131 (24.5)    | 10 (1.9)      | 20 (3.8)       |       |
|                                                    |                 | <i>-a/aa</i>  | 272 (42.8)    | 146 (23.0)    | 18 (2.8)      | 153 (24.1)    | 13 (2.0)      | 34 (5.4)       |       |
|                                                    |                 | <i>-a/-a</i>  | 76 (46.9)     | 33 (20.4)     | 3 (1.9)       | 37 (22.8)     | 7 (4.3)       | 6 (3.7)        | 0.650 |
| <b>Age in months Median (IQR)*</b>                 | Controls        | 6 (5-8)       | 7 (5-9)       | 7 (5-9)       | 6 (5-8)       | 6 (4-8)       | 6 (5-9)       | 0.285          |       |
|                                                    | Cases           | 28 (17-43)    | 29 (16-43)    | 33 (21-49)    | 30 (17-46)    | 31 (15-47)    | 31 (19-44)    | 0.817          |       |

The Pearson's Chi square test (or Fisher's exact test when numbers in any category <10) was used to test for differences in the distribution of *ABO* genotypes across categorical variables of gender, ethnic group and HbS and  $\alpha$ +thalassaemia genotype while the Kruskal-Wallis test was used to test for differences in age (as a continuous variable) by *ABO* genotype in controls and cases separately. IQR, interquartile range. For severe malaria, including specific clinical sub-types (CM, cerebral malaria; SMA, severe malarial anaemia; RD, respiratory distress & mortality), comparisons were made to community controls used as the reference group. 77 controls and 5 cases had missing *ABO* genotypes.
