# Supplementary material for: Non-O ABO blood group genotypes differ in their associations with Plasmodium falciparum rosetting and severe malaria
Source: PubMed Central journal article supplement (PMC10522014; doi:10.1371/journal.pgen.1010910), 2023-09-14
Supplement: pgen.1010910.s002.pdf [file pgen.1010910.s002.pdf]

**S2 Table: *P. falciparum* parasite density by ABO genotype in severe malaria cases**

| <i>ABO genotype</i> | <i>Number of patients</i> <sup>†</sup> | <i>Parasite density/μL (95% CI)</i> | <i>p value</i> |
|---------------------|----------------------------------------|-------------------------------------|----------------|
| <i>OO</i>           | 612                                    | 62550 (50834 – 74265)               | Reference      |
| <i>AO</i>           | 301                                    | 57406 (42096 – 72717)               | 0.605          |
| <i>AA</i>           | 37                                     | 58246 (14006 – 102486)              | 0.858          |
| <i>BO</i>           | 335                                    | 67952 (50723 – 85181)               | 0.605          |
| <i>BB</i>           | 33                                     | 72630 (14288 – 130972)              | 0.723          |
| <i>AB</i>           | 61                                     | 52147 (21218 – 83076)               | 0.567          |
| <i>Non-O</i>        | 767                                    | 61956 (51601 – 72310)               | 0.994          |

Differences in parasite density by *ABO* genotype were tested by linear regression with adjustment for confounding by HbAS, ethnicity and gender. Comparisons were made between *ABO* genotype *OO* and individual non-*O* genotypes (*AO*, *AA*, *BO*, *BB* & *AB*) or all non-*O* genotypes combined.

<sup>†</sup>Data were available for 1379 of the 1398 cases successfully genotyped for *ABO*. 17 cases had missing parasite density data and 2 had missing HbAS data.
