# Supplementary material for: Non-O ABO blood group genotypes differ in their associations with Plasmodium falciparum rosetting and severe malaria
Source: PubMed Central journal article supplement (PMC10522014; doi:10.1371/journal.pgen.1010910), 2023-09-14
Supplement: pgen.1010910.s003.pdf [file pgen.1010910.s003.pdf]

**S3 Table: Comparing Odds ratio differences for specific severe malaria syndromes between single dose and double dose non-*O* genotypes using the Wald test**

| Case Phenotype   | ABO genotype    | No Cases/Controls | Odds Ratio comparisons | Wald test <i>p</i> value |
|------------------|-----------------|-------------------|------------------------|--------------------------|
| <i>All CM</i>    | <i>AO vs AA</i> | 166/810; 22/83    | 1.29/1.60              | 0.422                    |
|                  | <i>BO vs BB</i> | 160/683; 16/55    | 1.45/1.90              | 0.396                    |
|                  | <i>AO vs AB</i> | 166/810; 26/115   | 1.29/1.47              | 0.595                    |
|                  | <i>BO vs AB</i> | 160/683; 26/115   | 1.45/1.47              | 0.951                    |
| <i>All SMA</i>   | <i>AO vs AA</i> | 97/810; 9/83      | 1.35/1.18              | 0.736                    |
|                  | <i>BO vs BB</i> | 99/683; 10/55     | 1.62/1.71              | 0.896                    |
|                  | <i>AO vs AB</i> | 97/810; 19/115    | 1.35/2.05              | 0.137                    |
|                  | <i>BO vs AB</i> | 99/683; 19/115    | 1.62/2.05              | 0.394                    |
| <i>All RD</i>    | <i>AO vs AA</i> | 101/810; 13/83    | 1.41/1.68              | 0.598                    |
|                  | <i>BO vs BB</i> | 99/683; 20/55     | 1.63/2.01              | 0.586                    |
|                  | <i>AO vs AB</i> | 160/810; 12/115   | 1.41/1.25              | 0.715                    |
|                  | <i>BO vs AB</i> | 99/683; 12/115    | 1.63/1.25              | 0.414                    |
| <i>Mortality</i> | <i>AO vs AA</i> | 33/810; 2/83      | 1.74/1.00              | 0.456                    |
|                  | <i>BO vs BB</i> | 23/683; 2/55      | 1.35/1.66              | 0.785                    |
|                  | <i>AO vs AB</i> | 33/810; 4/115     | 1.74/1.50              | 0.785                    |
|                  | <i>BO vs AB</i> | 23/683; 4/115     | 1.35/1.50              | 0.849                    |

The Wald test was used to compare odds ratio differences between single dose and double dose non-*O* genotypes to test the hypothesis that double dose non-*O* genotypes (*AA*, *AB*, *BB*) are associated with a higher risk of severe malaria than single dose non-*O* genotypes (*AO*, *BO*). Odds ratios for severe malaria and specific severe malaria syndromes cerebral malaria (CM), severe malarial anaemia (SMA) and respiratory distress (RD), and malaria-specific mortality were determined following a fixed-effects logistic regression model comparing genotype frequencies between the non-*O* genotypes (*AO*, *AA*, *AB*, *BO*, *BB*) to the reference *OO* genotype with adjustments for self-reported ethnicity, gender,  $\alpha^+$ thalassaemia and HbAS. SM: Severe malaria; OR: Odds Ratio; LCI: Lower Confidence Interval (95%); UCI: Upper Confidence Interval. †Adjusted for HbS,  $\alpha^+$ thalassaemia, gender, ethnicity and interaction (HbS and  $\alpha^+$ thalassaemia).
