# Supplementary material for: Non-O ABO blood group genotypes differ in their associations with Plasmodium falciparum rosetting and severe malaria
Source: PubMed Central journal article supplement (PMC10522014; doi:10.1371/journal.pgen.1010910), 2023-09-14
Supplement: pgen.1010910.s004.pdf [file pgen.1010910.s004.pdf]

**S4 Table: A comparison of the odds ratio differences for severe malaria between single dose and double dose non-*O* genotypes using logistic regression with single dose non-*O* genotypes *AO/BO* as reference**

| Case Phenotype | No. Cases/controls | <i>ABO</i> genotype | Crude |      |      |                | Adjusted <sup>†</sup> |      |      |                |
|----------------|--------------------|---------------------|-------|------|------|----------------|-----------------------|------|------|----------------|
|                |                    |                     | OR    | LCI  | UCI  | <i>p</i> value | OR                    | LCI  | UCI  | <i>p</i> value |
| <i>All SM</i>  | 306/810            | <i>AO</i>           | 1     |      |      |                | 1                     |      |      | Reference      |
|                | 37/83              | <i>AA</i>           | 1.18  | 0.78 | 1.78 | 0.428          | 1.15                  | 0.74 | 1.78 | 0.528          |
|                | 61/115             | <i>AB</i>           | 1.40  | 1.00 | 1.97 | 0.049          | 1.53                  | 1.07 | 2.18 | 0.020          |
| <i>All SM</i>  | 337/683            | <i>BO</i>           | 1     |      |      |                | 1                     |      |      | Reference      |
|                | 34/55              | <i>BB</i>           | 1.25  | 0.80 | 1.96 | 0.323          | 1.26                  | 0.77 | 2.07 | 0.351          |
|                | 61/115             | <i>AB</i>           | 1.08  | 0.77 | 1.51 | 0.674          | 1.17                  | 0.82 | 1.68 | 0.384          |

Double dose non-*O* genotype odds ratios for severe malaria were generated following a fixed-effects logistic regression model comparing genotype frequencies between the non-*O* double dose genotypes (*AA/AB* or *BB/AB*) to the reference non-*O* single dose genotypes (*AO* or *BO*) with adjustments for self-reported ethnicity, gender,  $\alpha^+$ thalassaemia and HbAS. SM: Severe malaria; OR: Odds Ratio; LCI: Lower Confidence Interval (95%); UCI: Upper Confidence Interval. <sup>†</sup>Adjusted for HbS,  $\alpha^+$ thalassaemia, gender, ethnicity and interaction (HbS and  $\alpha^+$ thalassaemia).
