# Supplementary material for: Non-O ABO blood group genotypes differ in their associations with Plasmodium falciparum rosetting and severe malaria
Source: PubMed Central journal article supplement (PMC10522014; doi:10.1371/journal.pgen.1010910), 2023-09-14
Supplement: pgen.1010910.s005.pdf [file pgen.1010910.s005.pdf]

**S5 Table: Cytoadhesion of *P. falciparum* line ItG by ABO genotype**

| ItG static adhesion to CD36   |          |                                  |                   |         |
|-------------------------------|----------|----------------------------------|-------------------|---------|
| N                             | Genotype | Mean pRBCs bound/mm <sup>2</sup> | 95% CI            | p value |
| 51                            | OO       | 1385.64                          | 1179.40 – 1591.89 | -       |
| 32                            | AO       | 1345.61                          | 1087.33 – 1603.89 | 0.814   |
| 6                             | AA       | 817.42                           | 312.59 – 1322.25  | 0.073   |
| 17                            | BO       | 1146.66                          | 813.49 – 1479.84  | 0.246   |
| 3                             | BB       | 1030.24                          | 308.69 – 1751.79  | 0.386   |
| 3                             | AB       | 779.62                           | 157.27 – 1401.96  | 0.123   |
|                               |          |                                  |                   |         |
| 61                            | Non-O    | 1191.53                          | 1014.74 – 1368.32 | 0.163   |
| ItG static adhesion to ICAM-1 |          |                                  |                   |         |
| N                             | Genotype | Mean pRBCs bound/mm <sup>2</sup> | 95% CI            | p value |
| 51                            | OO       | 1640.72                          | 1389.18– 1892.27  | -       |
| 32                            | AO       | 1602.70                          | 1286.15 – 1919.25 | 0.854   |
| 6                             | AA       | 1567.11                          | 772.38 – 2361.83  | 0.864   |
| 17                            | BO       | 1356.65                          | 956.95 – 1756.34  | 0.254   |
| 3                             | BB       | 1296.59                          | 398.11 – 2195.08  | 0.493   |
| 3                             | AB       | 1030.40                          | 237.05 – 1823.75  | 0.208   |
|                               |          |                                  |                   |         |
| 61                            | Non-O    | 1479.30                          | 1261.03 – 1697.57 | 0.340   |

Differences in ItG *P. falciparum* line binding to CD36 and ICAM-1 by ABO genotype were tested using multivariate linear regression analysis with adjustment for confounding by HbAS and  $\alpha^+$ thalassemia genotypes (including an interaction between HbAS and  $\alpha^+$ thalassemia). 112 RBC donor samples were tested once in duplicate over seven experimental days (day 1 n = 13, day 2 n = 8, day 3 n = 12, day 4 n = 1, day 5 n = 55, day 6 n = 15 and day 7 n = 8), therefore, experimental day was included as a co-variate to account for day-to-day variation.
