# Supplementary material for: Non-O ABO blood group genotypes differ in their associations with Plasmodium falciparum rosetting and severe malaria
Source: PubMed Central journal article supplement (PMC10522014; doi:10.1371/journal.pgen.1010910), 2023-09-14
Supplement: pgen.1010910.s006.pdf [file pgen.1010910.s006.pdf]

**S6 Table: ITvar9 PfEMP1 expression by ABO genotype**

| IT/R29 (ITvar9) PfEMP1 expression   |          |                         |                   |         |
|-------------------------------------|----------|-------------------------|-------------------|---------|
| N                                   | Genotype | Mean MFI                | 95% CI            | p value |
| 23                                  | OO       | 3412.88                 | 3180.61 – 3645.17 | -       |
| 18                                  | AO       | 3548.06                 | 3283.57 – 3812.56 | 0.452   |
| 2                                   | AA       | 3714.24                 | 2869.41– 4559.07  | 0.487   |
| 9                                   | BO       | 3325.30                 | 2952.46– 3698.14  | 0.696   |
| 1                                   | BB       | 3753.62                 | 2617.84 – 4889.41 | 0.562   |
| 7                                   | AB       | 3750.16                 | 3317.22 – 4183.10 | 0.173   |
|                                     |          |                         |                   |         |
| 37                                  | Non-O    | 3550.45                 | 3372.44 – 3728.45 | 0.333   |
| Percentage ITvar9 PfEMP1 expression |          |                         |                   |         |
| N                                   | Genotype | % pRBCs ITvar9 positive | 95% CI            | p value |
| 23                                  | OO       | 56.71                   | 53.74 – 59.69     | -       |
| 18                                  | AO       | 54.92                   | 51.53 – 58.31     | 0.437   |
| 2                                   | AA       | 57.94                   | 47.13 – 68.76     | 0.824   |
| 9                                   | BO       | 53.40                   | 48.62 – 58.17     | 0.252   |
| 1                                   | BB       | 56.40                   | 41.86 – 70.95     | 0.967   |
| 7                                   | AB       | 55.73                   | 50.19– 61.28      | 0.756   |
|                                     |          |                         |                   |         |
| 37                                  | Non-O    | 54.95                   | 52.71 – 57.18     | 0.361   |

Differences in ITvar9 PfEMP1 expression by ABO genotype in the *P. falciparum* IT/R29 rosetting parasite line were tested by multivariate regression analysis with adjustment for confounding by HbAS and  $\alpha$ \*thalassemia (including interaction between HbAS and  $\alpha$ \*thalassemia). 60 RBC donor samples were tested once in duplicate over two successive experimental days (day 1 n = 30 and day 2 n = 30), therefore, experimental day was included as a co-variate to account for day-to-day variation.
