# Supplementary material for: Non-O ABO blood group genotypes differ in their associations with Plasmodium falciparum rosetting and severe malaria
Source: PubMed Central journal article supplement (PMC10522014; doi:10.1371/journal.pgen.1010910), 2023-09-14
Supplement: pgen.1010910.s007.pdf [file pgen.1010910.s007.pdf]

**S7 Table: General characteristics of the Kilifi longitudinal cohort study by *ABO* genotype**

| Characteristics        |                             | <i>OO</i> (%) | <i>AO</i> (%) | <i>AA</i> (%) | <i>BO</i> (%) | <i>BB</i> (%) | <i>AB</i> (%) | <i>p</i> value |
|------------------------|-----------------------------|---------------|---------------|---------------|---------------|---------------|---------------|----------------|
| Sample size            | n = 242                     | 135 (55.8)    | 52 (21.5)     | 2 (0.8)       | 44 (18.2)     | 4 (1.6)       | 5 (2.1)       |                |
| Gender                 | Males                       | 58 (56.3)     | 21 (20.4)     | 0 (0.0)       | 20 (19.4)     | 2 (1.94)      | 2 (1.94)      | 0.933          |
|                        | Females                     | 77 (55.4)     | 31 (22.3)     | 2 (1.4)       | 24 (17.3)     | 2 (1.4)       | 3 (2.2)       |                |
| Ethnic group           | Giriama                     | 118 (56.5)    | 44 (21.1)     | 1 (0.5)       | 39 (18.6)     | 4 (1.9)       | 3 (1.4)       | 0.120          |
|                        | Chonyi                      | 8 (38.1)      | 6 (28.5)      | 1 (4.8)       | 5 (23.8)      | 0 (0.0)       | 1 (4.8)       |                |
|                        | Others                      | 9 (75.0)      | 2 (16.7)      | 0 (0.0)       | 0 (0.0)       | 0 (0.0)       | 1 (8.3)       |                |
| Sickle                 | AA                          | 124 (58.5)    | 43 (20.3)     | 2 (0.9)       | 38 (17.9)     | 2 (0.9)       | 3 (1.4)       | 0.029          |
|                        | AS                          | 11 (36.6)     | 9 (30.0)      | 0 (0.0)       | 6 (20.0)      | 2 (6.67)      | 2 (6.67)      |                |
| $\alpha$ +thalassaemia | $\alpha\alpha/\alpha\alpha$ | 41 (55.4)     | 20 (27.0)     | 1 (1.4)       | 11 (14.8)     | 1 (1.4)       | 0 (0.0)       | 0.043          |
|                        | $-\alpha/\alpha\alpha$      | 75 (61.5)     | 16 (13.1)     | 1 (0.8)       | 25 (20.5)     | 2 (1.6)       | 3 (2.5)       |                |
|                        | $-\alpha/-\alpha$           | 19 (41.3)     | 16 (34.7)     | 0 (0.0)       | 8 (17.4)      | 1 (2.2)       | 2 (4.4)       |                |
| Age in months          |                             |               |               |               |               |               |               |                |
| Median (IQR)           |                             | 32.2 (16-49)  | 30 (12-50)    | 39 (30-49)    | 39 (20-53)    | 40 (18-54)    | 39 (18-49)    | <0.001         |

The Fisher's exact test was used to test for differences in the distribution of *ABO* genotypes across categorical variables of gender, ethnic group, HbS and  $\alpha$ +thalassaemia genotypes while the Kruskal-Wallis test was used to test for differences in age (as a continuous variable) by *ABO* genotype. IQR, interquartile range. The significant differences in *ABO* genotypes in relation to HbS genotype,  $\alpha$ +thalassaemia genotype and age may be due to the very small numbers in the "double dose" non-*O* genotype categories. Analysis of this dataset therefore included adjustment for these variables.
