# Supplementary material for: Non-O ABO blood group genotypes differ in their associations with Plasmodium falciparum rosetting and severe malaria
Source: PubMed Central journal article supplement (PMC10522014; doi:10.1371/journal.pgen.1010910), 2023-09-14
Supplement: pgen.1010910.s008.pdf [file pgen.1010910.s008.pdf]

**S8 Table: Incidence rate ratios (IRR) for uncomplicated malaria in Kenya by ABO genotype**

| N   | Episodes | ABO genotype | Crude |      |      |         | Adjusted <sup>†</sup> |      |      |         |
|-----|----------|--------------|-------|------|------|---------|-----------------------|------|------|---------|
|     |          |              | IRR   | LCI  | UCI  | p value | IRR                   | LCI  | UCI  | p value |
| 135 | 528      | OO           | 1     |      |      |         | 1                     |      |      |         |
| 52  | 237      | AO           | 1.13  | 0.80 | 1.60 | 0.495   | 1.26                  | 0.90 | 1.78 | 0.181   |
| 2   | 10       | AA           | 1.19  | 0.27 | 5.31 | 0.817   | 1.03                  | 0.26 | 4.05 | 0.963   |
| 5   | 19       | AB           | 0.81  | 0.30 | 2.16 | 0.672   | 1.01                  | 0.40 | 2.56 | 0.986   |
| 44  | 158      | BO           | 0.81  | 0.56 | 1.18 | 0.279   | 0.95                  | 0.66 | 1.37 | 0.787   |
| 4   | 6        | BB           | 0.37  | 0.10 | 1.38 | 0.139   | 0.58                  | 0.16 | 2.11 | 0.411   |
| 107 | 430      | Non-O*       | 0.96  | 0.72 | 1.27 | 0.753   | 1.09                  | 0.83 | 1.45 | 0.532   |

Incidence rate ratios and 95% confidence intervals were generated using a random effects Poisson regression analysis, either without or <sup>†</sup>with adjustment for age, season, ethnic group, HbAS and  $\alpha$ -thalassaemia. The analysis also took into account within person clustering of events. Data represent 250, 88.1, 4.5, 10.7, 82.6, & 6.1 child years of follow up for OO, AO, AA, AB, BO and BB genotypes respectively. \* Analysis comparing non-O to OO was done using a recessive model of inheritance. Abbreviations: IRR, incident rate ratio; LCI: lower 95% confidence interval; UCI: upper 95% confidence interval.
