# Supplementary material for: Non-O ABO blood group genotypes differ in their associations with Plasmodium falciparum rosetting and severe malaria
Source: PubMed Central journal article supplement (PMC10522014; doi:10.1371/journal.pgen.1010910), 2023-09-14
Supplement: pgen.1010910.s009.pdf [file pgen.1010910.s009.pdf]

**S9 Table: Odds ratios (OR) for asymptomatic malaria in Kenya by ABO genotype**

| N   | Prevalence <sup>§</sup> | ABO genotype | Crude |      |       |         | Adjusted <sup>†</sup> |      |       |         |
|-----|-------------------------|--------------|-------|------|-------|---------|-----------------------|------|-------|---------|
|     |                         |              | OR    | LCI  | UCI   | p value | OR                    | LCI  | UCI   | p value |
| 124 | 44/360 (12%)            | OO           | 1     |      |       |         | 1                     |      |       |         |
| 48  | 24/130 (18.5%)          | AO           | 1.63  | 0.90 | 2.97  | 0.110   | 1.84                  | 1.00 | 3.38  | 0.051   |
| 2   | 0/7 (0.0%)              | AA           | -     | -    | -     | -       | -                     | -    | -     | -       |
| 5   | 3/16 (18.8%)            | AB           | 1.66  | 0.20 | 13.52 | 0.635   | 1.77                  | 0.20 | 15.86 | 0.749   |
| 43  | 18/127 (14.2%)          | BO           | 1.19  | 0.62 | 2.27  | 0.598   | 1.12                  | 0.56 | 2.26  | 0.743   |
| 2   | 2/7 (28.6%)             | BB           | 2.88  | 0.52 | 15.94 | 0.225   | 3.34                  | 0.66 | 16.91 | 0.146   |
| 100 | 47/287 (16.4%)          | Non-O*       | 1.41  | 0.84 | 2.36  | 0.190   | 1.45                  | 0.85 | 2.46  | 0.170   |

<sup>§</sup>Prevalence: Number of *P. falciparum* positive slides/total slides (%). These data were derived from four cross-sectional surveys as part of the Kilifi longitudinal cohort study carried out in March, July and October 2000 and June 2001. Odds ratios and 95% confidence intervals were generated using a logistic regression analysis, without or <sup>†</sup>with adjustment for age, season, ethnic group and HbAS genotype. The analysis also took into account within person clustering of events. \*Analysis comparing non-O to blood group O was done using a recessive model of inheritance. Abbreviations: OR, odds ratio; LCI: lower 95% confidence interval; UCI: upper 95% confidence interval.
